# Supplementary material for: Lower Energy Intake among Advanced vs. Early Parkinson’s Disease Patients and Healthy Controls in a Clinical Lunch Setting: A Cross-Sectional Study
Source: PubMed Central journal article supplement (PMC7400863; doi:10.3390/nu12072109), 2020-07-16

## Supplementary Material

Table S1. Additional regression models exploring explanatory variables (more than 10% effect on the primary outcome model) for the lower energy intake among advanced stage Parkinson disease patients in comparison to healthy controls (exploratory analysis).

| <b>Explanatory models</b>     | <b><i>B</i></b> | <b><i>t</i></b> | <b><i>p</i></b> | <b>Lower Bound 95% Confidence Interval for B</b> | <b>Upper Bound 95% Confidence Interval for B</b> |
|-------------------------------|-----------------|-----------------|-----------------|--------------------------------------------------|--------------------------------------------------|
| <b>Spoonfuls</b>              |                 |                 |                 |                                                  |                                                  |
| Sex                           | 183.045         | 4.004           | 0.000           | 91.493                                           | 274.598                                          |
| Early PD                      | 24.435          | 0.491           | 0.625           | -75.256                                          | 124.126                                          |
| Advanced PD                   | -99.466         | -1.975          | 0.053           | -200.296                                         | 1.364                                            |
| Spoonfuls                     | 9.259           | 5.867           | 0.000           | 6.098                                            | 12.419                                           |
| <b>UE Tremor</b>              |                 |                 |                 |                                                  |                                                  |
| Sex                           | 310.753         | 5.833           | 0.000           | 204.063                                          | 417.443                                          |
| Early PD                      | 66.672          | 0.995           | 0.324           | -67.541                                          | 200.885                                          |
| Advanced PD                   | -127.330        | -1.821          | 0.074           | -267.331                                         | 12.672                                           |
| Tremor UE                     | -21.665         | -1.057          | 0.295           | -62.692                                          | 19.362                                           |
| <b>Eating problems</b>        |                 |                 |                 |                                                  |                                                  |
| Sex                           | 304.080         | 5.838           | 0.000           | 199.731                                          | 408.428                                          |
| Early PD                      | 43.816          | 0.701           | 0.486           | -81.464                                          | 169.095                                          |
| Advanced PD                   | -135.645        | -2.094          | 0.041           | -265.410                                         | -5.879                                           |
| Self-reported eating Problems | -58.564         | -0.958          | 0.342           | -181.021                                         | 63.894                                           |
| <b>Dysphagia</b>              |                 |                 |                 |                                                  |                                                  |
| Sex                           | 301.607         | 5.809           | 0.000           | 197.629                                          | 405.585                                          |
| Early PD                      | 41.079          | 0.659           | 0.512           | -83.683                                          | 165.841                                          |
| Advanced PD                   | -139.809        | -2.152          | 0.036           | -269.886                                         | -9.731                                           |
| Dysphagia                     | -74.294         | -1.092          | 0.279           | -210.539                                         | 61.952                                           |

\* = Model is significant,  $P < 0.05$ . Sex: 1 = male, 0 = female. PD = Parkinson's disease. *B* = unstandardized *b* coefficients showing the change in kcal, *t* = the *t* test statistic, *p* = the probability value. UE = upper extremity.

Table S2. Additional regression models exploring variables that enhanced the lower energy intake more than 10% among advanced stage Parkinson disease patients in comparison to healthy controls (exploratory analysis).

| <b>Explanatory models</b> | <b><i>B</i></b> | <b><i>t</i></b> | <b><i>p</i></b> | <b>Lower Bound 95% Confidence Interval for B</b> | <b>Upper Bound 95% Confidence Interval for B</b> |
|---------------------------|-----------------|-----------------|-----------------|--------------------------------------------------|--------------------------------------------------|
| <b>Brady-/hypokinesia</b> |                 |                 |                 |                                                  |                                                  |
| Sex                       | 297.363         | 5.686           | 0.000           | 192.632                                          | 402.095                                          |
| Early PD                  | 26.81           | 0.350           | 0.728           | -124.965                                         | 177.927                                          |
| Advanced PD               | -182.928        | -2.084          | 0.042           | -358.678                                         | -7.179                                           |
| UE Brady-/hypokinesia     | 3.249           | 0.337           | 0.737           | -16.038                                          | 22.535                                           |
| <b>Water intake</b>       |                 |                 |                 |                                                  |                                                  |
| Sex                       | 299.814         | 5.766           | 0.000           | 195.692                                          | 403.936                                          |
| Early PD                  | 31.635          | 0.500           | 0.619           | -94.967                                          | 158.238                                          |
| Advanced PD               | -186.555        | -2.776          | 0.007           | -321.144                                         | -51.966                                          |
| Water intake              | -0.307          | -0.931          | 0.356           | -0.967                                           | 0.353                                            |
| <b>Constipation</b>       |                 |                 |                 |                                                  |                                                  |
| Sex                       | 326.572         | 5.852           | 0.000           | 214.599                                          | 438.545                                          |
| Early PD                  | 59.796          | 0.903           | 0.370           | -73.017                                          | 192.609                                          |
| Advanced PD               | -188.560        | -2.772          | 0.008           | -325.073                                         | -52.046                                          |
| Constipation              | -10.381         | -0.144          | 0.886           | -154.874                                         | 134.111                                          |
| <b>Smell problems</b>     |                 |                 |                 |                                                  |                                                  |
| Sex                       | 294.411         | 5.511           | 0.000           | 187.388                                          | 401.434                                          |
| Early PD                  | 7.384           | 0.085           | 0.933           | -166.588                                         | 181.357                                          |
| Advanced PD               | -195.398        | -2.261          | 0.028           | -368.548                                         | -22.247                                          |
| Smell problems            | 49.313          | 0.586           | 0.560           | -119.239                                         | 217.864                                          |

\* = Model is significant,  $P < 0.05$ . Sex: 1 = male, 0 = female. PD = Parkinson's Disease. *B* = unstandardized *b* coefficients, *t* = the *t* test statistic, *p* = the probability value. UE = upper extremity.

Table S3. Additional regression models exploring explanatory variables (more than 10% effect on the primary outcome model) for the lower energy intake among advanced stage Parkinson disease patients in comparison to early PD patients (exploratory analysis).

| <b>Explanatory models</b> | <b><i>B</i></b> | <b><i>t</i></b> | <b><i>p</i></b> | <b>Lower Bound 95% Confidence Interval for B</b> | <b>Upper Bound 95% Confidence Interval for B</b> |
|---------------------------|-----------------|-----------------|-----------------|--------------------------------------------------|--------------------------------------------------|
| <b>Spoonfuls</b>          |                 |                 |                 |                                                  |                                                  |
| Sex                       | 183.045         | 4.004           | 0.000           | 91.493                                           | 274.598                                          |
| Healthy control           | -24.435         | -0.491          | 0.625           | -124.126                                         | 75.256                                           |
| Advanced PD               | -123.901        | -2.378          | 0.021           | -228.226                                         | -19.576                                          |
| Spoonfuls                 | 9.259           | 5.867           | 0.000           | 6.098                                            | 12.419                                           |
| <b>Eating problems</b>    |                 |                 |                 |                                                  |                                                  |
| Sex                       | 304.080         | 5.838           | 0.000           | 199.731                                          | 408.428                                          |
| Healthy control           | -43.816         | -0.701          | 0.486           | -169.095                                         | 81.464                                           |
| Advanced PD               | -179.460        | -2.751          | 0.008           | -310.118                                         | -48.803                                          |
| Eating problems           | -58.564         | -0.958          | 0.342           | -181.021                                         | 63.894                                           |
| <b>Dysphagia</b>          |                 |                 |                 |                                                  |                                                  |
| Sex                       | 301.607         | 5.809           | 0.000           | 197.629                                          | 405.585                                          |
| Healthy control           | -41.079         | -0.659          | 0.512           | -165.841                                         | 83.683                                           |
| Advanced PD               | -180.888        | -2.733          | 0.008           | -313.415                                         | -48.361                                          |
| Dysphagia                 | -74.294         | -1.092          | 0.279           | -210.539                                         | 61.952                                           |

\* = Model is significant,  $P < 0.05$ . Sex: 1 = male, 0 = female. PD = Parkinson's Disease. *B* = unstandardized *b* coefficients showing the change in kcal, *t* = the *t* test statistic, *p* = the probability value.

Table S4. Additional regression models exploring variables that enhanced the lower energy intake more than 10% among advanced stage Parkinson disease patients in comparison to healthy controls (exploratory analysis).

| <b>Explanatory models</b> | <b><i>B</i></b> | <b><i>t</i></b> | <b><i>p</i></b> | <b>Lower Bound 95% Confidence Interval for <i>B</i></b> | <b>Upper Bound 95% Confidence Interval for <i>B</i></b> |
|---------------------------|-----------------|-----------------|-----------------|---------------------------------------------------------|---------------------------------------------------------|
| <b>Constipation</b>       |                 |                 |                 |                                                         |                                                         |
| Sex                       | 326.572         | 5.852           | 0.000           | 214.599                                                 | 438.545                                                 |
| Healthy control           | -59.796         | -0.903          | 0.370           | -192.609                                                | 73.017                                                  |
| Advanced PD               | -248.356        | -3.584          | 0.001           | -387.399                                                | -109.312                                                |
| Constipation              | -10.381         | -0.144          | 0.886           | -154.874                                                | 134.111                                                 |

\* = Model is significant,  $P < 0.05$ . Sex: 1 = male, 0 = female. PD = Parkinson's Disease. *B* = unstandardized *b* coefficients showing the change in kcal, *t* = the *t* test statistic, *p* = the probability value.

Figure S1. Participant flowchart.

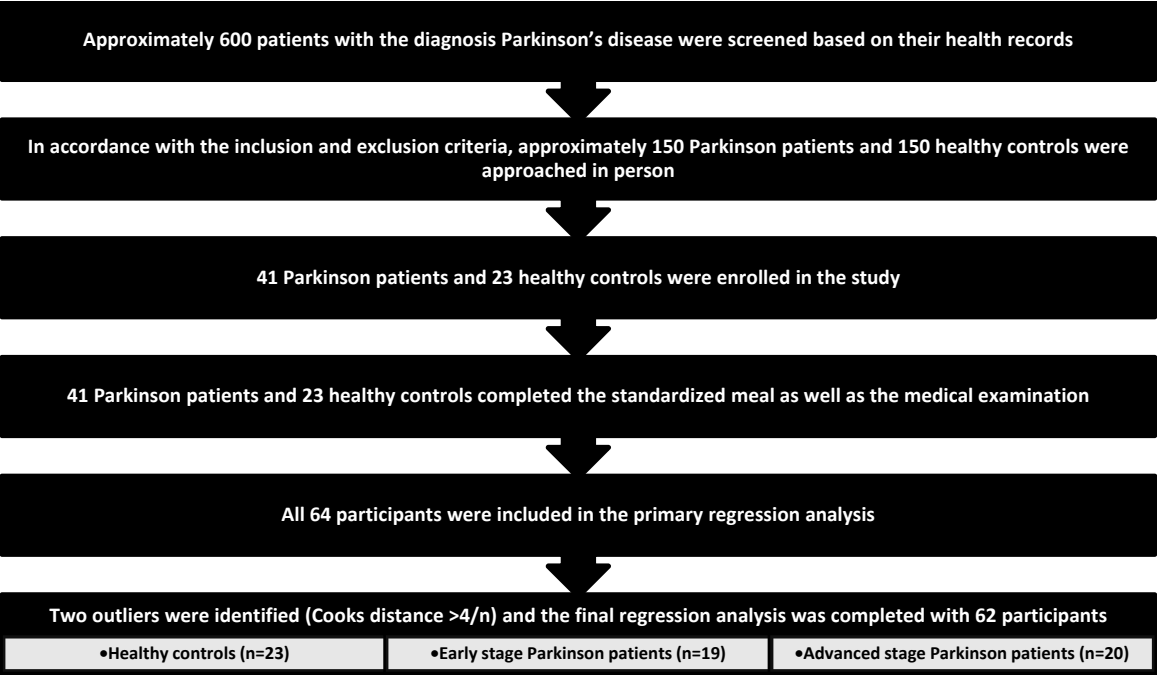

Supplement: nutrients-12-02109-s001.pdf [file nutrients-12-02109-s001.pdf]
